# Supplementary material
Source: ML conference proceedings conference paper supplement (https://openaccess.thecvf.com/content/cvpr_2017/html/Vernaza_Learning_Random-Walk_Label_2017_CVPR_paper.html)
Supplement: Supplementary file 1 [file Vernaza_Learning_Random-Walk_Label_2017_CVPR_supplemental.pdf.pdf]

# Learning random-walk label propagation for weakly-supervised semantic segmentation: Supplemental material

Paul Vernaza      Manmohan Chandraker  
NEC Labs America, Media Analytics Department  
10080 N Wolfe Road, Cupertino, CA 95014

{pvernaza, manu}@nec-labs.com

## 1. Additional results

### 1.1. Additional qualitative results

An expanded version of the VOC 2012 result figure is shown in Fig. 1.

## 2. Derivations

### 2.1. Probabilistic justification of loss

In Sec. 2.1, it is claimed that Eq. 2 follows from marginalizing Eq. 1 over the unobserved labels, given certain assumptions. This is proved here.

Marginalizing the objective in Eq. 1 over  $y$  is expressed as:

$$\sum_{\tilde{y}, \tilde{B}} P_{y, B | \tilde{y}, I}(\tilde{y}, \tilde{B}) \sum_{x \in X} H(\delta_{\tilde{y}(x)}, Q_{\theta, I}(x)). \quad (1)$$

Using the conditional independence assumptions and the assumption that  $B$  is a deterministic function of  $I$  yields

$$\sum_{\tilde{y}} P_{y | \tilde{y}, B_I}(\tilde{y}) \sum_{x \in X} H(\delta_{\tilde{y}(x)}, Q_{\theta, I}(x)), \quad (2)$$

where  $B_I$  denotes the boundaries as a function of  $I$ . Assuming that  $y(x)$  and  $y(x')$  are conditionally independent given  $\tilde{y}, B, \forall x \neq x' \in X$  allows us to represent  $P_{y | \tilde{y}, B_I}$  as a product of factors:

$$\sum_{\tilde{y}} \left( \prod_{x' \in X} P_{y(x') | \tilde{y}, B_I}(\tilde{y}(x')) \right) \sum_{x \in X} H(\delta_{\tilde{y}(x)}, Q_{\theta, I}(x)). \quad (3)$$

Factorizing out sums equal to one results in

$$\sum_{x \in X} \sum_{\tilde{y}(x)} P_{y(x) | \tilde{y}, B_I}(\tilde{y}(x)) H(\delta_{\tilde{y}(x)}, Q_{\theta, I}(x)). \quad (4)$$

Expanding the definition of cross-entropy yields the desired expression:

$$\sum_{x \in X} H(P_{y(x) | \tilde{y}, B_I}, Q_{\theta, I}(x)) \quad (5)$$

### 2.2. Fréchet derivative of matrix inverse

This result is used in the derivation of the derivative of the random-walk partition function. An intuitive derivation is provided here.

Suppose  $Ax = b$ . We wish to find an expansion linear in  $\epsilon V$  for  $\tilde{x} := (A + \epsilon V)^{-1}b$ , assuming the inverse exists.

$$(A + \epsilon V)\tilde{x} = b \quad (6)$$

$$A\tilde{x} = b - \epsilon V\tilde{x} \quad (7)$$

$$\tilde{x} = A^{-1}b - \epsilon A^{-1}V\tilde{x} \quad (8)$$

$$= A^{-1}b - \epsilon A^{-1}V(A^{-1}b - O(\epsilon)) \quad (9)$$

$$= A^{-1}b - \epsilon A^{-1}VA^{-1}b + O(\epsilon^2) \quad (10)$$

where the second-to-last line follows from recursive expansion of the same expression.

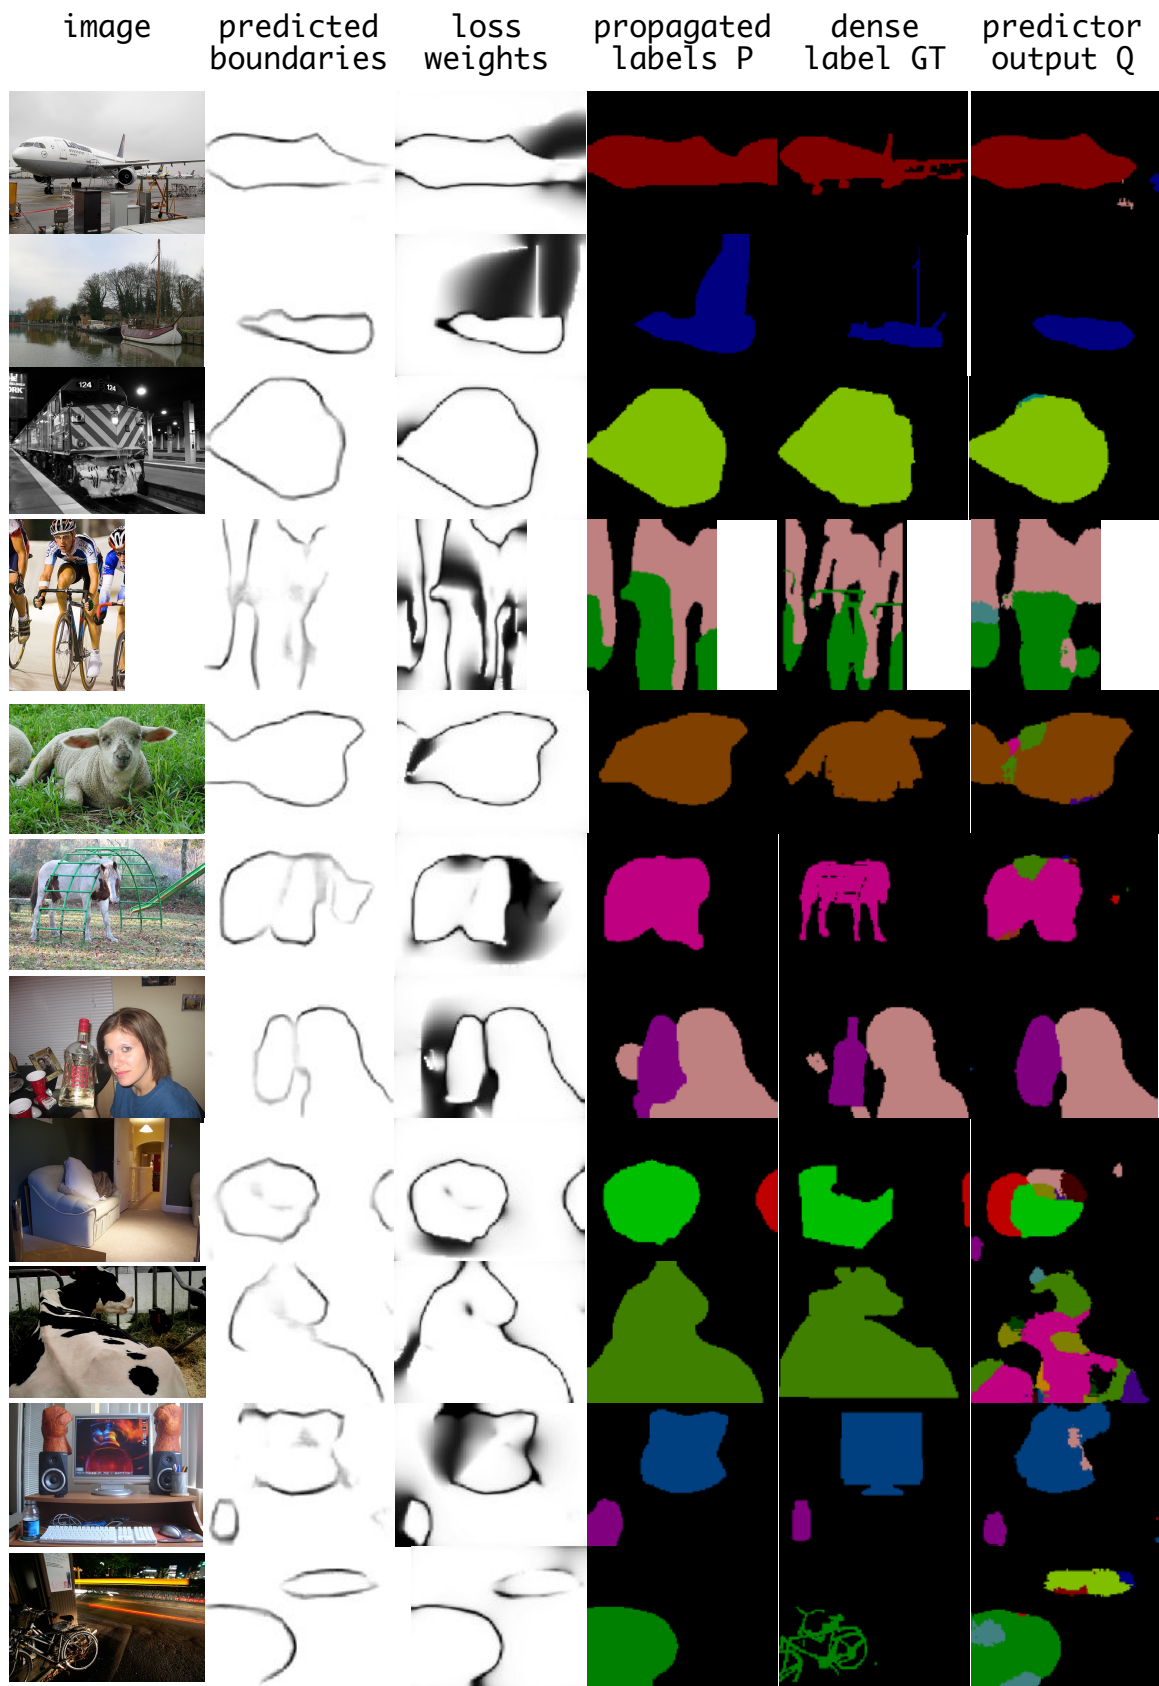

Figure 1: Validation set results on VOC 2012 dataset
